# Supplementary material for: Toothbrush microbiomes feature a meeting ground for human oral and environmental microbiota
Source: Microbiome. 2021 Jan 31;9:32. doi: 10.1186/s40168-020-00983-x (PMC7849112; doi:10.1186/s40168-020-00983-x)
Supplement: Supplementary file 8 — Additional file 7: Table S4. Accession numbers and available metadata for the oral metagenomes used in the resistome analysis, which correspond to the subset in Figure 3a. [file 40168_2020_983_MOESM8_ESM.xlsx]

## Sheet: Sheet1
Centroid No.	Accession	Sequence_Run	Host_Gender	Oral_Environment
1	SRS104282	SRR1804378	Female	Buccal_mucosa
2	SRS142896	SRR514849	Male	Tongue_dorsum
3	SRS078250	SRR1031063	Female	Buccal_mucosa
4	SRS063823	SRR1804274	Female	Keratinized_gingiva
5	SRS017810	SRR059875	Male	Buccal_mucosa
6	SRS142664	SRR513813	Female	Supragingival_plaque
7	SRS147712	SRR1804260	Female	Tongue_dorsum
8	SRS893299	SRR1952532	Female	Supragingival_plaque
9	SRS149184	SRR1031677	Male	Tongue_dorsum
10	SRS053895	SRR1804718	Male	Supragingival_plaque
11	SRS143310	SRR628262	Female	Tongue_dorsum
12	SRS142602	SRR513802	Female	Tongue_dorsum
13	SRS017630	SRR1565744	Male	Buccal_mucosa
14	SRS143022	SRR514244	Female	Tongue_dorsum
15	SRS1041173	SRR2175813	Female	Supragingival_plaque
16	SRS014468	SRR062389	Female	Saliva
17	SRS016647	SRR1564324	Female	Tongue_dorsum
18	SRS144427	SRR1804818	Male	Supragingival_plaque
19	SRS142531	SRR513376	Female	Buccal_mucosa
20	SRS017687	SRR059905	Female	Buccal_mucosa
21	SRS018739	SRR061249	Female	Tongue_dorsum
22	SRS893336	SRR1952578	Male	Buccal_mucosa
23	SRS011090	SRR060389	Female	Buccal_mucosa
24	SRS893290	SRR1952524	Male	Tongue_dorsum
25	SRS019906	SRR061257	Male	Supragingival_plaque
26	SRS042307	SRR1803859	Male	Supragingival_plaque
27	SRS142907	SRR1803853	Male	Supragingival_plaque
28	SRS893323	SRR1952557	Female	Buccal_mucosa
29	SRS102808	SRR533811	Female	Tongue_dorsum
30	SRS019696	SRR1804292	Female	Tongue_dorsum
31	SRS043018	SRR061251	Female	Supragingival_plaque
32	SRS062540	SRR346700	Female	Tongue_dorsum
33	SRS052668	SRR060041	Female	Buccal_mucosa
34	SRS143427	SRR514204	Male	Buccal_mucosa
